# Supplementary material for: Cardiotoxicity of trastuzumab in patients with HER2-positive gastric cancer
Source: PubMed Central journal article supplement (PMC5617468; doi:10.18632/oncotarget.18700), 2017-06-27
Supplement: oncotarget-08-61837-s001.pdf [file oncotarget-08-61837-s001.pdf]

## Cardiotoxicity of trastuzumab in patients with HER2-positive gastric cancer

### SUPPLEMENTARY MATERIALS

**Supplementary Table 1: Comparison of TIC in four studies regarding trastuzumab combination treatment in gastric cancer patients**

| Combination regimen          | Total number of the patients in TG | Inclusion criteria of baseline LVEF | Definition of TIC                                                             | Reported incidence of TIC (%) | Reported incidence of any grade of drop in LVEF (%) | Reversibility reported | Reference                  |
|------------------------------|------------------------------------|-------------------------------------|-------------------------------------------------------------------------------|-------------------------------|-----------------------------------------------------|------------------------|----------------------------|
| Trastuzumab + FP or XP       | 298                                | ≥50%                                | ≥10% drop in LVEF to an absolute value <50%                                   | 11/237 (5%)                   | N/A                                                 | N/A                    | [11]                       |
| Trastuzumab+ SP              | 30                                 | ≥50%                                | >10% drop in LVEF from baseline                                               | 6/30(20%)                     | 15/30(50%)                                          | N/A                    | [14]                       |
| Trastuzumab + FP or XP       | 23                                 | N/A                                 | >10% drop in LVEF from baseline                                               | 6/23(26%)                     | N/A                                                 | N/A                    | [15]                       |
| Trastuzumab + FP or XP or SP | 70                                 | ≥55%                                | an absolute decline of at least 10 % points from the baseline to a value <55% | 5/70(7.1%)                    | 44/70(62.9%)                                        | Yes*                   | Present study <sup>§</sup> |

TIC, trastuzumab-induced cardiotoxicity; FP, 5-fluorouracil plus cisplatin; N/A, not available; SP, S-1 plus cisplatin; TG, trastuzumab-treated group; XP, capecitabine plus cisplatin; \*In most cases, a significant asymptomatic drop in LVEF was reversible within 6 weeks by discontinuation of trastuzumab, or in 8 to 10 weeks despite continuation of trastuzumab, except in one case in which it was impossible to re-assess due to the cancer-related death of the patient;<sup>§</sup>The present study included a portion of the patients in the ToGA trial [11] and a phase II study of trastuzumab in combination with S-1 and cisplatin [14]
